# Supplementary material
Source: Research Square preprint supplement (doi:10.21203/rs.3.rs-8212878/v1)
Supplement: Supplementary file 1 [file b6e809bbceee4edcd25f7f9e.docx]

TABLE 1 Baseline characteristics according to LAR index quartiles.

| **Variables** | **Total**  **(n = 1020)** | **1 (n = 254)** | **2 (n = 254)** | **3 (n = 256)** | **4 (n = 256)** | **Statistic** | ***P*** |
| --- | --- | --- | --- | --- | --- | --- | --- |
|
| Age, M (Q₁, Q₃) | 63.00 (43.75, 76.00) | 66.00 (50.00,76.00) | 66.00 (51.25,81.00) | 62.00 (41.00,77.00) | 53.50 (33.75,70.00) | χ²=40.33# | **<.001** |
| BMI, M (Q₁, Q₃) | 25.70 (22.50, 29.37) | 25.64 (22.32,29.60) | 25.29 (22.12,28.85) | 26.45 (22.86,29.84) | 25.77 (22.75,29.02) | χ²=4.75# | 0.191 |
| Heart Rate , M (Q₁, Q₃) | 88.00 (74.00, 102.00) | 87.00 (74.00,97.00) | 86.00 (72.00,100.00) | 87.00 (73.00,99.00) | 94.50 (81.00,111.00) | χ²=39.78# | **<.001** |
| Sbp , M (Q₁, Q₃) | 129.00 (114.00, 146.00) | 136.00 (121.00,152.00) | 129.00 (116.12,145.00) | 130.00 (114.00,145.00) | 124.00 (109.00,138.25) | χ²=29.01# | **<.001** |
| Dbp , M (Q₁, Q₃) | 71.00 (60.00, 83.00) | 73.00 (62.00,84.75) | 70.00 (60.00,82.00) | 72.00 (62.00,83.00) | 70.00 (59.00,81.00) | χ²=4.13# | 0.247 |
| Lymphocytes, M (Q₁, Q₃) | 11.94 (7.30, 18.20) | 13.15 (8.70,20.21) | 11.23 (6.60,17.30) | 11.40 (7.02,17.33) | 11.89 (7.18,18.23) | χ²=10.09# | **0.018** |
| Neutrophils , M (Q₁, Q₃) | 78.70 (69.70, 84.93) | 76.50 (66.00,82.97) | 80.00 (71.18,86.02) | 79.49 (71.16,85.01) | 78.10 (70.73,84.82) | χ²=14.30# | **0.003** |
| Platelet, M (Q₁, Q₃) | 192.00 (139.00, 245.25) | 207.00 (155.50,254.00) | 191.50 (140.25,245.50) | 195.00 (145.00,247.00) | 167.50 (115.00,224.25) | χ²=25.60# | **<.001** |
| Wbc , M (Q₁, Q₃) | 11.30 (8.10, 14.72) | 10.85 (7.30,13.90) | 10.80 (8.00,13.60) | 11.80 (8.90,15.12) | 12.00 (8.07,17.60) | χ²=21.37# | **<.001** |
| Rbc, M (Q₁, Q₃) | 3.71 (3.22, 4.24) | 3.71 (3.28,4.20) | 3.76 (3.21,4.26) | 3.75 (3.33,4.30) | 3.59 (3.05,4.19) | χ²=4.09# | 0.251 |
| Hemoglobin , M (Q₁, Q₃) | 11.40 (9.88, 12.93) | 11.40 (9.90,12.60) | 11.60 (9.90,13.10) | 11.70 (10.10,13.00) | 11.10 (9.40,13.20) | χ²=5.28# | 0.152 |
| Bun, M (Q₁, Q₃) | 15.00 (11.00, 22.00) | 14.00 (10.00,20.00) | 16.00 (12.00,23.00) | 16.00 (11.00,22.00) | 14.50 (11.00,21.00) | χ²=11.70# | **0.008** |
| Creatinine, M (Q₁, Q₃) | 0.90 (0.70, 1.20) | 0.80 (0.70,1.00) | 0.80 (0.70,1.10) | 0.90 (0.70,1.12) | 1.00 (0.80,1.30) | χ²=21.20# | **<.001** |
| Glucose, M (Q₁, Q₃) | 133.50 (110.00, 170.00) | 123.50 (105.00,149.75) | 128.50 (107.00,157.75) | 138.00 (112.75,173.00) | 150.00 (116.00,201.25) | χ²=51.72# | **<.001** |
| Aniongap, M (Q₁, Q₃) | 15.00 (12.75, 18.00) | 14.00 (12.00,16.00) | 14.00 (12.00,17.00) | 15.00 (13.00,18.00) | 16.66 (14.00,20.00) | χ²=54.81# | **<.001** |
| Bicarbonate, M (Q₁, Q₃) | 22.00 (19.00, 25.00) | 24.00 (22.00,26.00) | 23.00 (20.25,25.00) | 22.50 (20.00,25.00) | 20.00 (17.00,22.25) | χ²=130.59# | **<.001** |
| Calcium Total , M (Q₁, Q₃) | 8.30 (7.80, 8.90) | 8.50 (8.10,9.00) | 8.50 (8.00,8.80) | 8.30 (7.70,8.90) | 8.10 (7.50,8.60) | χ²=44.43# | **<.001** |
| Chloride , M (Q₁, Q₃) | 104.00 (100.00, 108.00) | 103.00 (100.00,106.00) | 104.00 (100.00,107.00) | 104.00 (100.00,108.00) | 106.00 (101.75,111.00) | χ²=33.12# | **<.001** |
| Potassium, M (Q₁, Q₃) | 4.00 (3.60, 4.40) | 3.90 (3.52,4.30) | 3.90 (3.50,4.40) | 4.00 (3.60,4.40) | 4.00 (3.50,4.40) | χ²=5.76# | 0.124 |
| Sodium, M (Q₁, Q₃) | 139.00 (136.00, 141.00) | 139.00 (136.00,141.00) | 139.00 (136.00,141.00) | 138.50 (136.00,141.00) | 140.00 (136.00,143.00) | χ²=10.53# | **0.015** |
| Pt , M (Q₁, Q₃) | 13.10 (11.90, 14.80) | 12.70 (11.60,14.07) | 12.95 (11.72,14.47) | 13.10 (11.90,14.50) | 13.85 (12.40,16.90) | χ²=47.39# | **<.001** |
| INR , M (Q₁, Q₃) | 1.20 (1.10, 1.30) | 1.10 (1.10,1.30) | 1.20 (1.10,1.30) | 1.20 (1.10,1.30) | 1.30 (1.10,1.50) | χ²=46.48# | **<.001** |
| CK, M (Q₁, Q₃) | 1337.27 (245.50, 4587.41) | 1191.50 (202.17,4316.48) | 1047.17 (194.50,3947.25) | 1310.41 (285.50,4640.15) | 1933.18 (401.00,4961.50) | χ²=10.52# | **0.015** |
| GCS , M (Q₁, Q₃) | 15.00 (15.00, 15.00) | 15.00 (14.00,15.00) | 15.00 (15.00,15.00) | 15.00 (15.00,15.00) | 15.00 (15.00,15.00) | χ²=15.25# | **0.002** |
| Sapsii, M (Q₁, Q₃) | 34.00 (26.00, 43.00) | 32.00 (26.00,40.75) | 36.00 (28.00,43.00) | 34.00 (25.75,42.00) | 36.00 (27.75,46.00) | χ²=13.14# | **0.004** |
| Sofa , M (Q₁, Q₃) | 1.00 (0.00, 2.00) | 0.00 (0.00,1.00) | 1.00 (0.00,2.00) | 1.00 (0.00,2.00) | 1.00 (0.00,3.00) | χ²=36.25# | **<.001** |
| Survival Days, M (Q₁, Q₃) | 21.00 (7.00, 124.00) | 46.00 (14.00,213.00) | 24.00 (9.50,164.50) | 20.50 (6.75,112.75) | 9.00 (3.00,34.00) | χ²=34.69# | **<.001** |
| Los Hospital, M (Q₁, Q₃) | 13.05 (6.98, 23.10) | 14.65 (8.07,25.58) | 11.95 (6.41,20.27) | 12.35 (7.34,21.80) | 13.35 (6.72,24.50) | χ²=6.52# | 0.089 |
| Los Icu, M (Q₁, Q₃) | 4.50 (1.95, 10.42) | 4.19 (1.87,10.10) | 3.99 (1.88,8.44) | 4.29 (1.90,10.58) | 5.89 (2.51,12.01) | χ²=8.94# | **0.030** |
| Gender, n(%) |  |  |  |  |  | χ²=2.75 | 0.432 |
| 0 | 322 (31.57) | 88 (34.65) | 84 (33.07) | 77 (30.08) | 73 (28.52) |  |  |
| 1 | 698 (68.43) | 166 (65.35) | 170 (66.93) | 179 (69.92) | 183 (71.48) |  |  |
| Hypertension, n(%) |  |  |  |  |  | χ²=16.16 | **0.001** |
| 0 | 619 (60.69) | 135 (53.15) | 147 (57.87) | 158 (61.72) | 179 (69.92) |  |  |
| 1 | 401 (39.31) | 119 (46.85) | 107 (42.13) | 98 (38.28) | 77 (30.08) |  |  |
| Myocardial Infarct, n(%) |  |  |  |  |  | χ²=5.01 | 0.171 |
| 0 | 935 (91.67) | 230 (90.55) | 227 (89.37) | 236 (92.19) | 242 (94.53) |  |  |
| 1 | 85 (8.33) | 24 (9.45) | 27 (10.63) | 20 (7.81) | 14 (5.47) |  |  |
| Congestive Heart Failure, n(%) |  |  |  |  |  | χ²=3.89 | 0.274 |
| 0 | 851 (83.43) | 207 (81.50) | 207 (81.50) | 214 (83.59) | 223 (87.11) |  |  |
| 1 | 169 (16.57) | 47 (18.50) | 47 (18.50) | 42 (16.41) | 33 (12.89) |  |  |
| Diabetes, n(%) |  |  |  |  |  | χ²=7.79 | 0.051 |
| 0 | 793 (77.75) | 193 (75.98) | 197 (77.56) | 189 (73.83) | 214 (83.59) |  |  |
| 1 | 227 (22.25) | 61 (24.02) | 57 (22.44) | 67 (26.17) | 42 (16.41) |  |  |
| Renal Disease, n(%) |  |  |  |  |  | χ²=4.29 | 0.231 |
| 0 | 897 (87.94) | 223 (87.80) | 220 (86.61) | 220 (85.94) | 234 (91.41) |  |  |
| 1 | 123 (12.06) | 31 (12.20) | 34 (13.39) | 36 (14.06) | 22 (8.59) |  |  |
| Liver Disease, n(%) |  |  |  |  |  | χ²=20.40 | **<.001** |
| 0 | 918 (90.00) | 238 (93.70) | 234 (92.13) | 234 (91.41) | 212 (82.81) |  |  |
| 1 | 102 (10.00) | 16 (6.30) | 20 (7.87) | 22 (8.59) | 44 (17.19) |  |  |
| Sepsis, n(%) |  |  |  |  |  | χ²=14.58 | **0.002** |
| 0 | 350 (34.31) | 96 (37.80) | 98 (38.58) | 93 (36.33) | 63 (24.61) |  |  |
| 1 | 670 (65.69) | 158 (62.20) | 156 (61.42) | 163 (63.67) | 193 (75.39) |  |  |
| Malignant Cancer, n(%) |  |  |  |  |  | χ²=6.21 | 0.102 |
| 0 | 974 (95.49) | 239 (94.09) | 239 (94.09) | 245 (95.70) | 251 (98.05) |  |  |
| 1 | 46 (4.51) | 15 (5.91) | 15 (5.91) | 11 (4.30) | 5 (1.95) |  |  |
| Chronic Pulmonary Disease, n(%) |  |  |  |  |  | χ²=11.70 | **0.008** |
| 0 | 888 (87.06) | 213 (83.86) | 213 (83.86) | 225 (87.89) | 237 (92.58) |  |  |
| 1 | 132 (12.94) | 41 (16.14) | 41 (16.14) | 31 (12.11) | 19 (7.42) |  |  |
| Surgery , n(%) |  |  |  |  |  | χ²=6.40 | 0.093 |
| 0 | 806 (79.02) | 203 (79.92) | 210 (82.68) | 189 (73.83) | 204 (79.69) |  |  |
| 1 | 214 (20.98) | 51 (20.08) | 44 (17.32) | 67 (26.17) | 52 (20.31) |  |  |
| Rrt, n(%) |  |  |  |  |  | χ²=4.31 | 0.230 |
| 0 | 988 (96.86) | 250 (98.43) | 247 (97.24) | 247 (96.48) | 244 (95.31) |  |  |
| 1 | 32 (3.14) | 4 (1.57) | 7 (2.76) | 9 (3.52) | 12 (4.69) |  |  |
| Hospital Expire Flag, n(%) |  |  |  |  |  | χ²=18.42 | **<.001** |
| 0 | 832 (81.57) | 223 (87.80) | 212 (83.46) | 209 (81.64) | 188 (73.44) |  |  |
| 1 | 188 (18.43) | 31 (12.20) | 42 (16.54) | 47 (18.36) | 68 (26.56) |  |  |
| Icu Expire Flag, n(%) |  |  |  |  |  | χ²=30.92 | **<.001** |
| 0 | 911 (89.31) | 240 (94.49) | 235 (92.52) | 230 (89.84) | 206 (80.47) |  |  |
| 1 | 109 (10.69) | 14 (5.51) | 19 (7.48) | 26 (10.16) | 50 (19.53) |  |  |
| Mortality 28, n(%) |  |  |  |  |  | χ²=20.48 | **<.001** |
| 0 | 790 (77.45) | 214 (84.25) | 201 (79.13) | 201 (78.52) | 174 (67.97) |  |  |
| 1 | 230 (22.55) | 40 (15.75) | 53 (20.87) | 55 (21.48) | 82 (32.03) |  |  |
| Mortality 30, n(%) |  |  |  |  |  | χ²=19.66 | **<.001** |
| 0 | 789 (77.35) | 213 (83.86) | 201 (79.13) | 201 (78.52) | 174 (67.97) |  |  |
| 1 | 231 (22.65) | 41 (16.14) | 53 (20.87) | 55 (21.48) | 82 (32.03) |  |  |
| Mortality 90, n(%) |  |  |  |  |  | χ²=12.60 | **0.006** |
| 0 | 732 (71.76) | 196 (77.17) | 188 (74.02) | 185 (72.27) | 163 (63.67) |  |  |
| 1 | 288 (28.24) | 58 (22.83) | 66 (25.98) | 71 (27.73) | 93 (36.33) |  |  |
| Mortality 365, n(%) |  |  |  |  |  | χ²=10.03 | **0.018** |
| 0 | 670 (65.69) | 176 (69.29) | 176 (69.29) | 170 (66.41) | 148 (57.81) |  |  |
| 1 | 350 (34.31) | 78 (30.71) | 78 (30.71) | 86 (33.59) | 108 (42.19) |  |  |
| Kruskal-waills test, χ²: Chi-square test |  |  |  |  |  |  |  |
| M: Median, Q₁: 1rd Quartile, Q₃: 3rd Quartile |  |  |  |  |  |  |  |
|  |  |  |  |  |  |  |  |
|  | | | | | | | |
|  | | | | | | | |

Abbreviations:：LAR:Lactate-Albumin Ratio,WBC：White Blood Cell Count,BMI：Body Mass Index,Sbp：Systolic Blood Pressure,Rbc:Red Blood Cell,BUN:Blood Urea Nitrogen,Dbp:Diastolic Blood Pressure,PT:Prothrombin Time ,​INR:International Normalized Ratio ,CK:Creatine Kinase,Rrt:Renal Replacement Therapy
